# Supplementary material for: Stepwise construction of Ag29 nanocluster-based hydrogen evolution electrocatalysts
Source: Royal Society of Chemistry journal article supplement (doi:10.1039/d3nr03537a), 2023-01-01
Supplement: d3nr03537a1.pdf [file d3nr03537a1.pdf]

## ***Supplementary Information***

### **Stepwise Construction of Ag<sub>29</sub> Nanocluster-Based Hydrogen Evolution**

#### **Electrocatalysts**

Honglei Shen,<sup>†a</sup> Qingtao Zhu,<sup>†a</sup> Jiawei Xu,<sup>a</sup> Kun Ni,<sup>\*,c</sup> Xiao Wei,<sup>a</sup> Yuanxin Du,<sup>\*,b</sup> Shan Gao,<sup>\*,a</sup> Xi Kang<sup>\*,a</sup> and Manzhou Zhu<sup>a</sup>

<sup>a</sup> Department of Chemistry and Centre for Atomic Engineering of Advanced Materials, Anhui Province Key Laboratory of Chemistry for Inorganic/Organic Hybrid Functionalized Materials, Anhui University, Hefei 230601, P. R. China.

E-mail: shangao@ahu.edu.cn (S.G.); kangxi\_chem@ahu.edu.cn (X.K.)

<sup>b</sup> Key Laboratory of Structure and Functional Regulation of Hybrid Materials, Anhui University, Ministry of Education, Hefei 230601, P. R. China.

E-mail: duyuanxin@ahu.edu.cn (Y.D.)

<sup>c</sup> CAS Key Laboratory of Materials for Energy Conversion & Department of Materials Science and Engineering & iChEM, University of Science and Technology of China, Hefei, 230026, P. R. China.

E-mail: nikun@ustc.edu.cn (K.N.)

*+These authors contributed equally to this work.*

*This Supporting Information includes:*

Experimental Section

Figures S1-S20

Tables S1-S5

References

## Experimental Section

### 1. Materials

Silver nitrate ( $\text{AgNO}_3$ , 99.5% metal basis), hexachloroplatinic acid ( $\text{H}_2\text{PtCl}_6 \cdot 6\text{H}_2\text{O}$ , 99.9% metals basis), manganous chloride ( $\text{MnCl}_2$ , 97% metal basis), iron dichloride ( $\text{FeCl}_2$ , 97% metal basis), cobaltous chloride ( $\text{CoCl}_2$ , 97% metal basis), nickel chlorite ( $\text{NiCl}_2$ , 97% metal basis), 1,3- benzenedithiol (BDT,  $\text{C}_6\text{S}_2\text{H}_6$ , 99%), 1,3,5-benzenetrithiol (BTT,  $\text{C}_6\text{S}_3\text{H}_6$ , 99%), triphenylphosphine ( $\text{PPh}_3$ ,  $\text{C}_{18}\text{H}_{15}\text{P}$ , 99%), sodium borohydride ( $\text{NaBH}_4$ , 99%), methylene chloride ( $\text{CH}_2\text{Cl}_2$ , HPLC grade), methanol ( $\text{CH}_3\text{OH}$ , HPLC grade), ethyl ether ( $(\text{CH}_3)_2\text{O}$ , HPLC grade), N,N-dimethylformamide (DMF, HPLC grade) were purchased from Sigma-Aldrich. Cabot vulcan XC-72R (XC-72R, mesopor, >60%, OD: 2-4 nm) was purchased from Carbot Co. All reagents were used without further purification.

### 2. Synthesis

#### 2.1 Synthesis of $\text{MAg}_{28}\text{-BDT}$ ( $\text{M} = \text{Ag, Pt}$ )

The  $\text{Ag}_{29}\text{-BDT}$  and  $\text{Pt}_1\text{Ag}_{28}\text{-BDT}$  were synthesized via previously reported methods.<sup>1, 2</sup>

#### 2.2 Synthesis of $\text{Pt}_1\text{Ag}_{28}\text{-BTT}$

The  $\text{Pt}_1\text{Ag}_{28}\text{-BTT}$  nanocluster was prepared by reacting the  $[\text{Pt}_1\text{Ag}_{28}(\text{S-Adm})_{18}(\text{TPP})_4]^{2+}$  nanocluster (abbreviated as  $\text{Pt}_1\text{Ag}_{28}\text{-AdmSH}$ ) with BTT ligands. The  $\text{Pt}_1\text{Ag}_{28}\text{-AdmSH}$  was obtained via a previously reported method.<sup>3</sup> Specifically, 100 mg of  $\text{Pt}_1\text{Ag}_{28}\text{-AdmSH}$  was dissolved in 10 mL of  $\text{CH}_2\text{Cl}_2$  under vigorous stirring, and then 20 mg of BTT was added. After 10 minutes, 10 mg of  $\text{PPh}_4\text{Br}$  (dissolved in 1 mL of  $\text{CH}_3\text{OH}$ ) was added, and the reaction was continued for another 2 hours. After centrifugation, the dark orange precipitate was washed several times with  $\text{CH}_3\text{OH}$  to remove the excess thiol ligands. Then, 5 mL of DMF was used to extract the obtained  $\text{Pt}_1\text{Ag}_{28}\text{-BTT}$  nanocluster. The  $\text{Pt}_1\text{Ag}_{28}\text{-BTT}$  nanocluster was crystallized via a gas phase diffusion method by diffusing ethyl ether into the DMF solution of the nanocluster for three days.

#### 2.3 Synthesis of $\text{Pt}_1\text{Ag}_{28}\text{-BTT-M(50)}$ ( $\text{M} = \text{Mn, Fe, Co, Ni}$ )

2 mg of the  $\text{Pt}_1\text{Ag}_{28}\text{-BTT}$  nanocluster was dissolved in 1 mL of DMF, and 50  $\mu\text{L}$  of  $\text{MnCl}_2$ ,  $\text{FeCl}_2$ ,  $\text{CoCl}_2$ , or  $\text{NiCl}_2$  solutions (dissolved in DMF; 35.2 mg/mL) was dropped into the cluster solution. The obtained solution was stirred for 10 minutes and then stood for 1h to completely construct S-M interactions on the surface of  $\text{Pt}_1\text{Ag}_{28}\text{-BTT}$ . 100 mL of ethyl ether was used to wash the unreacted compositions. Finally, the  $\text{Pt}_1\text{Ag}_{28}\text{-BTT-M(50)}$  ( $\text{M} = \text{Mn, Fe, Co, Ni}$ ) was obtained.

#### 2.4 Synthesis of $\text{Pt}_1\text{Ag}_{28}\text{-BTT-Mn(X)}$ (X represents the molar ratio of nanoclusters to $\text{Mn}^{2+}$ )

2 mg of the Pt<sub>1</sub>Ag<sub>28</sub>-BTT nanocluster was dissolved in 1 mL of DMF. Then, 1  $\mu$ L, 5  $\mu$ L, 10  $\mu$ L, and 50  $\mu$ L of MnCl<sub>2</sub> solution (dissolved in DMF; 35.17 mg/mL) was dropped into the former solution. The obtained solution was stirred for 10 minutes and then stood for 1 h to completely construct S-M interactions on the surface of Pt<sub>1</sub>Ag<sub>28</sub>-BTT. 100 mL of ethyl ether was used to wash the unreacted compositions. Finally, the Pt<sub>1</sub>Ag<sub>28</sub>-BTT-Mn(1), Pt<sub>1</sub>Ag<sub>28</sub>-BTT-Mn(5), Pt<sub>1</sub>Ag<sub>28</sub>-BTT-Mn(10), and Pt<sub>1</sub>Ag<sub>28</sub>-BTT-Mn(50) was obtained.

### 2.5 Synthesis of all series of M<sub>29</sub> electrocatalysts (10 wt.% loaded in XC-72R)

20 mg of XC-72R were suspended in 2 mL of the mixed solvent of EtOH and DMF (V:V = 1:1), and the obtained solution was dispersed via ultrasonic for 30 minutes. Next, 2 mg of nanoclusters (dissolved in 1 mL of DMF) was slowly added to the suspensions and kept stirring for 8 h. The suspensions were centrifuged at high speed (rpm = 10000 r/min) to get precipitates and then washed by DMF and EtOH several times. Finally, the M<sub>29</sub> electrocatalysts were collected by decompression drying.

### 3. Characterization

The UV-vis absorption spectra of nanoclusters were recorded using an Agilent 8453 diode array spectrometer. Electrospray ionization mass spectrometry (ESI-MS) measurements were performed using a MicroTOF-QIII high-resolution mass spectrometer. For preparing the ESI samples, nanoclusters were dissolved in DMF (0.1 mg/mL) and diluted (V/V = 1:1) using CH<sub>3</sub>OH. X-ray photoelectron spectroscopy (XPS) measurements were performed on a Thermo ESCALAB 250 instrument configured with a monochromatized Al K $\alpha$  (1486.8 eV) 150 W X-ray source, 0.5 mm circular spot size, flood gun to counter charging effects, and analysis chamber base pressure lower than 1 $\times$ 10<sup>-9</sup> mbar. Inductively coupled plasma-atomic emission spectrometry (ICP-AES) measurements were performed on an Atomscan Advantage instrument made by Thermo Jarrell Ash Corporation (USA). The nanoclusters were digested with concentrated nitric acid, and the concentration of the nanoclusters was set to  $\sim$  0.1 mg/L. Dynamic light scattering (DLS) was performed with a Malvern Zetasizer Nano ZS instrument. The DLS result of each nanocluster was repeated 100 times to remove the error. Transmission electron microscopy (TEM) was conducted on a JEM-2100 microscope with an accelerating voltage of 200 kV. Energy-dispersive X-ray spectroscopy (EDS) analyses were performed on a JEOL JEM-2100F FEG TEM operated at 200 kV. The Pt<sub>1</sub>Ag<sub>28</sub>-BTT-Mn(10) catalyst was imaged with an aberration-corrected HAADF-STEM (high angle annular dark field scanning transmission electron microscope) after the solvent that contained Pt<sub>1</sub>Ag<sub>28</sub>-BTT-Mn(10) catalyst was drop-cast onto ultrathin carbon film TEM grids. The microscope employed was a FEI Themis Z. The electron beam energy was 200 kV.

### 4. X-ray crystallography

The data collection for single-crystal X-ray diffraction of Pt<sub>1</sub>Ag<sub>28</sub>-BTT was carried out on a Stoe Stadivari diffractometer under nitrogen flow, using graphite-monochromatized Cu K $\alpha$  radiation ( $\lambda = 1.54186 \text{ \AA}$ ). Data reductions and absorption corrections were performed using the SAINT and SADABS programs, respectively. The electron density was squeezed by Platon. The structure was solved by direct methods and refined with full-matrix least squares on F<sup>2</sup> using the SHELXTL software package. All non-hydrogen atoms were refined anisotropically, and all the hydrogen atoms were set in geometrically calculated positions and refined isotropically using a riding model. The CCDC number of the Pt<sub>1</sub>Ag<sub>28</sub>-BTT nanocluster is 2225417.

## 5. Electrochemical measurements

All electrochemical test were implemented in a three-electrode system at an electrochemical station (CHI760E). The graphite rod and the saturated Ag/AgCl electrode (Hg/HgO electrode for alkaline HER) served as the count electrode and the reference electrode, respectively. The catalyst ink was prepared as follows: 3 mg catalyst was dispersed in 0.6 mL of solution containing 590  $\mu\text{L}$  absolute ethyl alcohol and 10  $\mu\text{L}$  of 5 wt% Nafion solution, followed by ultrasonication for 30 min to form homogeneous ink. To prepare the working electrode, the ink was transferred onto the carbon paper (area of working electrode: 0.2 cm<sup>2</sup>). The ink was blow-dried by N<sub>2</sub> gas, a working electrode was obtained with a catalyst loading of 0.2 mg/cm<sup>2</sup>. Moreover, 0.5 M H<sub>2</sub>SO<sub>4</sub> and 1 M KOH were used as the acid and alkali electrolyte for HER, respectively.

The polarization curves were obtained by sweeping the potential from 0 to  $-0.7 \text{ V}$  versus Ag/AgCl at room temperature with a sweep rate of 5 mV/s in N<sub>2</sub>-saturated 0.5 M H<sub>2</sub>SO<sub>4</sub> solution and 1M KOH solution. It is worth noting that all polarization curves were corrected with 85% internal resistance (IR) drop compensation manually, and all potentials were referenced by reversible hydrogen electrodes (RHE). All the potentials shown in our tests were calibrated and transformed to RHE:  $E(\text{RHE}) = E(\text{Ag/AgCl}) + 0.2147 \text{ V}$  and  $E(\text{RHE}) = E(\text{Ag/AgCl}) + 0.9642 \text{ V}$  for acidic and alkaline conditions, respectively. Tafel slopes were calculated from the corresponding linear sweep voltammetry curves. Electrochemical impedance spectroscopy (EIS) measurements were carried out in a frequency range of 100 kHz to 0.01 Hz with an amplitude of 5 mV at the overpotential of 10 mA/cm<sup>2</sup>. The electrochemical active surface area (ECSA) of samples was estimated using a simple cyclic voltammetry (CV) method. The current density was measured from 20 mV to 180 mV with 40 mV/s increasing, and the voltage window (vs. RHE) was from 0.25 V to 0.35 V (0.5 M H<sub>2</sub>SO<sub>4</sub>) and 0.725 V to 0.825 V (1 M KOH). The ECSA is determined by dividing the  $C_{\text{dl}}$  with the specific capacitance,  $C_s$ , assuming a specific capacitance of 60  $\mu\text{F/cm}^2$ . The roughness factor was determined by dividing this ECSA with the geometric area of the electrode.<sup>4</sup>

## 6. Mass activity calculation

The following formula was used to calculate the mass activity of the samples:

$$\text{Mass activity} = \frac{\text{Current density}}{\text{percent of metal mass} \times \text{catalyst loading of working electrode}}$$

The noble metal contents of the four nanoclusters listed below were measured by inductively coupled plasma–atomic emission spectroscopy (ICP-AES):

Pt<sub>1</sub>Ag<sub>28</sub>-BTT-Mn(10): Ag: 49.4%

Pt<sub>1</sub>Ag<sub>28</sub>-BTT: Ag: 52.0%

Pt<sub>1</sub>Ag<sub>28</sub>-BDT: Ag: 50.8%

Ag<sub>29</sub>-BDT: Ag: 53.4%

## 7. Computational methods

Density functional theory (DFT)<sup>5</sup> calculations were performed using the Vienna ab initio simulation package (VASP) software<sup>6</sup> with Generalized Gradient Approximation (GGA)<sup>7</sup> and Perdew–Burke–Ernzerhof (PBE)<sup>8</sup> functional. The DFT-D3<sup>9,10</sup> method with Becke-Jonson damping was utilized for vdW corrections. To prevent interaction between periodic lattices, a vacuum layer larger than 10 Å was employed. Self-consistent field (SCF) iteration energy tolerance was set to 1×10<sup>-5</sup> eV, and force tolerance was set to 0.05 eV/Å for geometry optimizations. A plane wave basis set with an energy cutoff of 400 eV was used, with unrestricted spin for all calculations. A gamma-centered 1×1×1 K point was sampled for all cluster models.

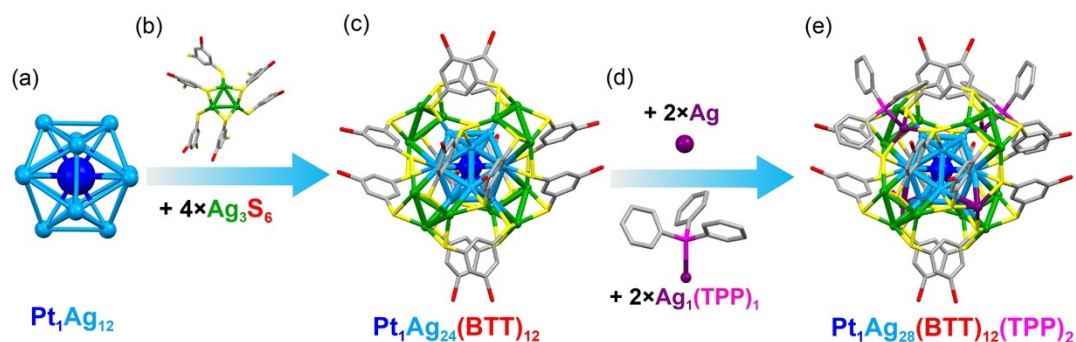

**Figure S1.** Structural anatomy of  $\text{Pt}_1\text{Ag}_{28}\text{-BTT}$  nanoclusters. Color legends: blue sphere, Pt; light blue/green/purple sphere, Ag; yellow sphere, connected S; red sphere, active S; magenta sphere, P; gray sphere, C. All H atoms are omitted for clarity.

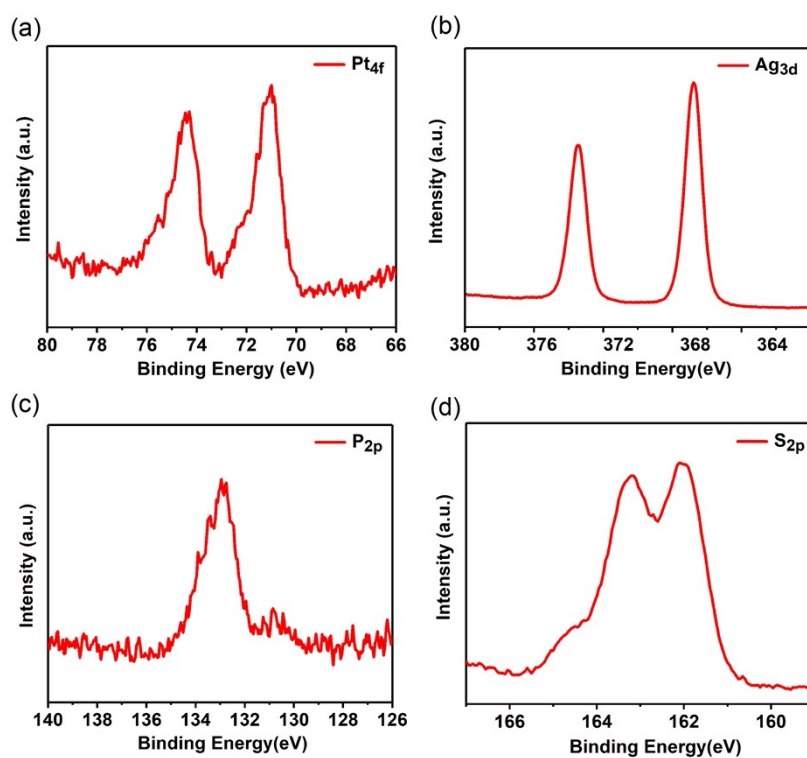

**Figure S2.** XPS spectra of the  $\text{Pt}_1\text{Ag}_{28}(\text{BTT})_{12}(\text{TPP})_2$  nanocluster. (a) Pt 4f, (b) Ag 3d, (c) P 2p and (d) S 2p.

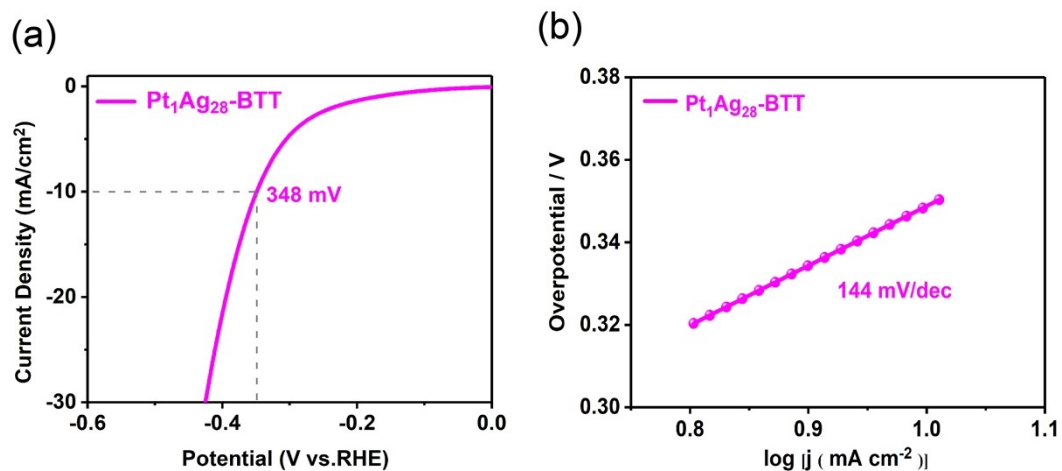

**Figure S3.** (a) LSV curve and (b) Tafel slope of the Pt<sub>1</sub>Ag<sub>28</sub>-BTT catalyst (loaded on XC-72R), measured in 0.5 M H<sub>2</sub>SO<sub>4</sub> solution.

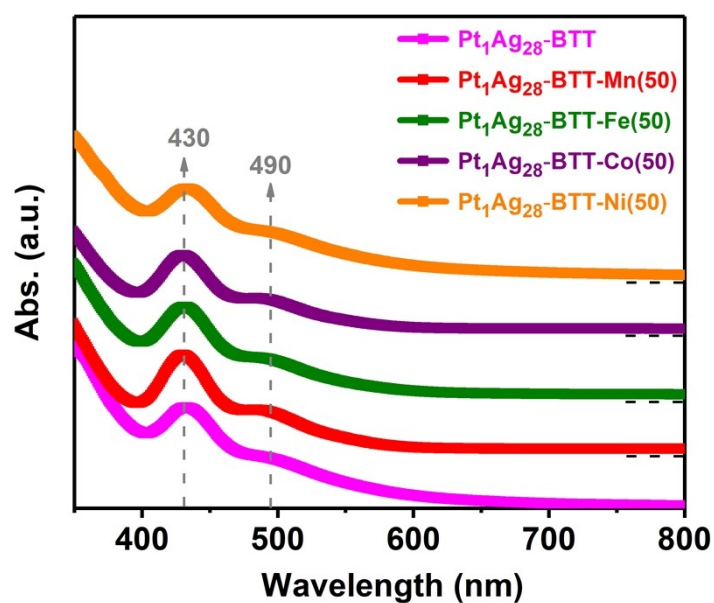

**Figure S4.** UV-vis comparison of Pt<sub>1</sub>Ag<sub>28</sub>-BTT and Pt<sub>1</sub>Ag<sub>28</sub>-BTT-M(50), these species have added different metal cations (Mn<sup>2+</sup>, Fe<sup>2+</sup>, Co<sup>2+</sup>, and Ni<sup>2+</sup>) to Pt<sub>1</sub>Ag<sub>28</sub>-BTT system.

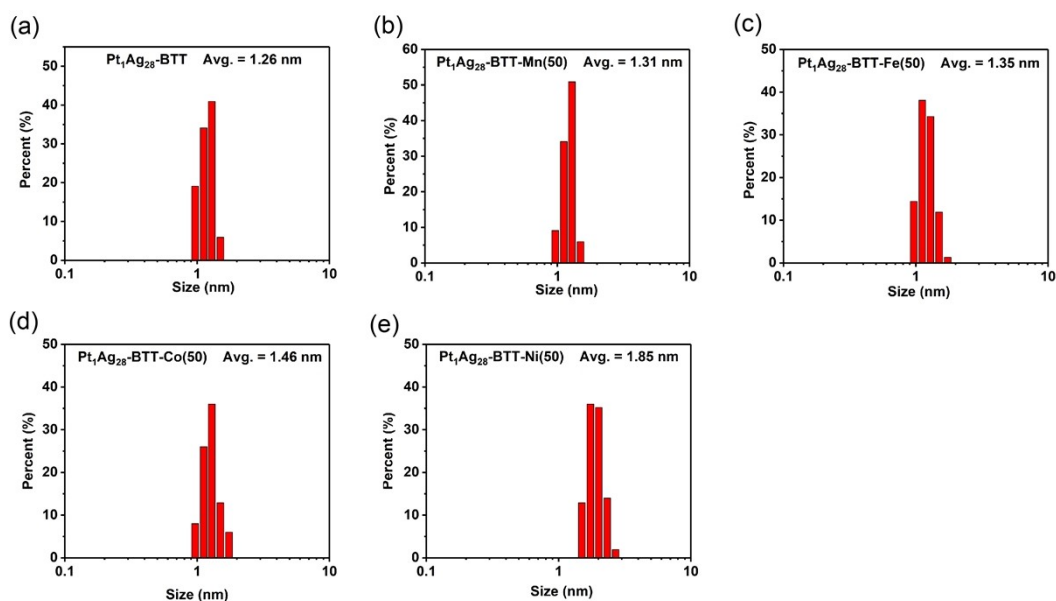

**Figure S5.** DLS results of before and after adding metal cations to  $\text{Pt}_1\text{Ag}_{28}\text{-BTT}$  system. (a)  $\text{Pt}_1\text{Ag}_{28}\text{-BTT}$ ; (b)  $\text{Pt}_1\text{Ag}_{28}\text{-BTT-Mn(50)}$ ; (c)  $\text{Pt}_1\text{Ag}_{28}\text{-BTT-Fe(50)}$ ; (d)  $\text{Pt}_1\text{Ag}_{28}\text{-BTT-Co(50)}$ ; (e)  $\text{Pt}_1\text{Ag}_{28}\text{-BTT-Ni(50)}$ . All the  $\text{Pt}_1\text{Ag}_{28}\text{-BTT-M(50)}$  were measured in DMF solution.

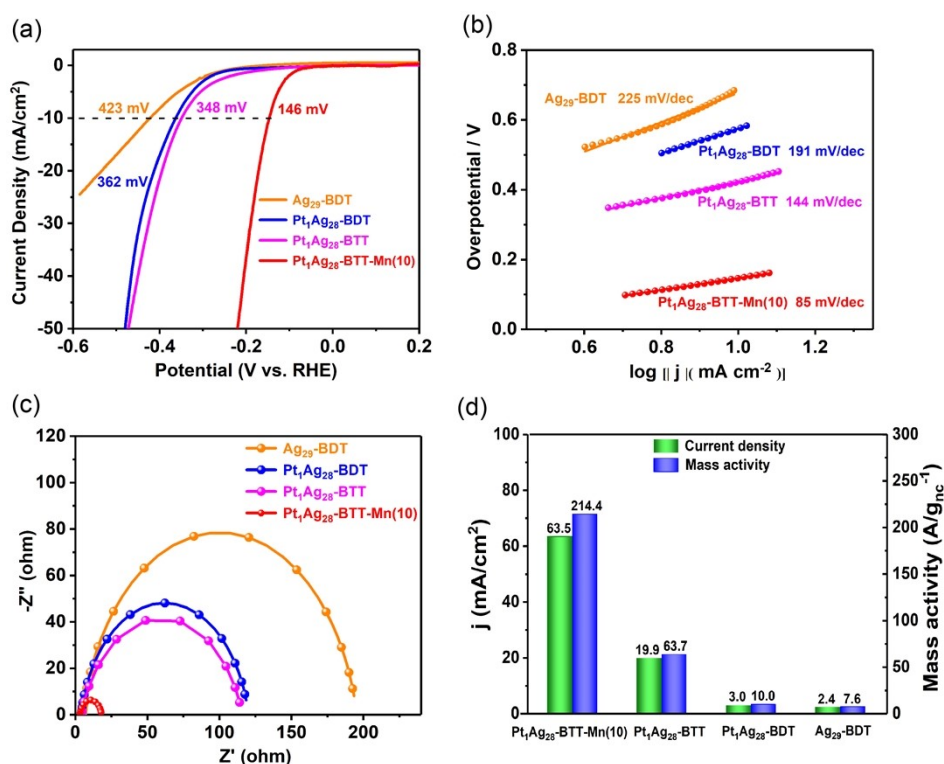

**Figure S6.** HER ability comparison of a series of  $\text{M}_{29}$  nano-catalysts in 0.5 M  $\text{H}_2\text{SO}_4$  solution. Electrochemical measurement of (a) LSV curves; (b) Tafel slopes; and (c) EIS Nyquist plots; (d) Bar diagram of the current density and mass activity comparison for  $\text{M}_{29}$  nano-catalysts at the overpotential of 0.25 V versus RHE.

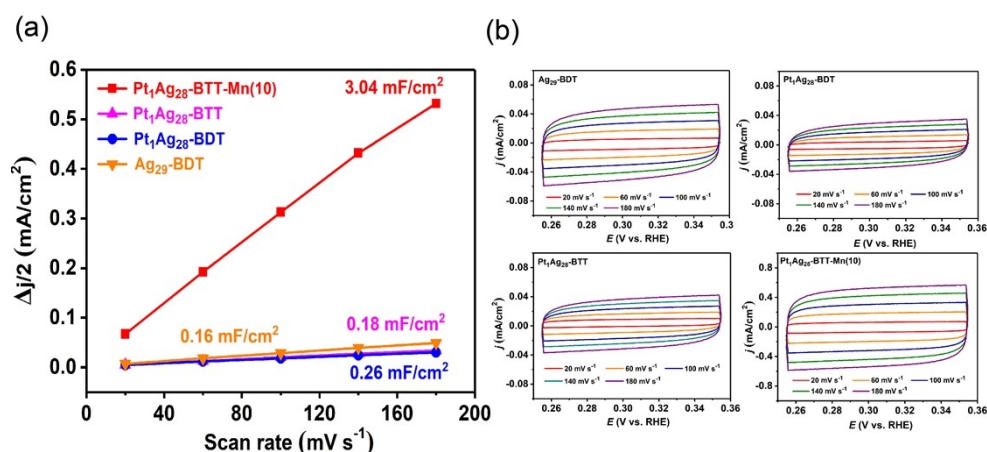

**Figure S7.** (a) The calculated  $C_{dl}$  for  $\text{M}_{29}$  nano-catalysts in 0.5 M  $\text{H}_2\text{SO}_4$  solution; (b) The corresponding CV curves of  $\text{Ag}_{29}\text{-BDT}$ ,  $\text{Pt}_1\text{Ag}_{28}\text{-BDT}$ ,  $\text{Pt}_1\text{Ag}_{28}\text{-BTT}$  and  $\text{Pt}_1\text{Ag}_{28}\text{-BTT-Mn(10)}$  at different scan rates of 20, 60, 100, 140, and 180  $\text{mV s}^{-1}$  in 0.5 M  $\text{H}_2\text{SO}_4$  solution

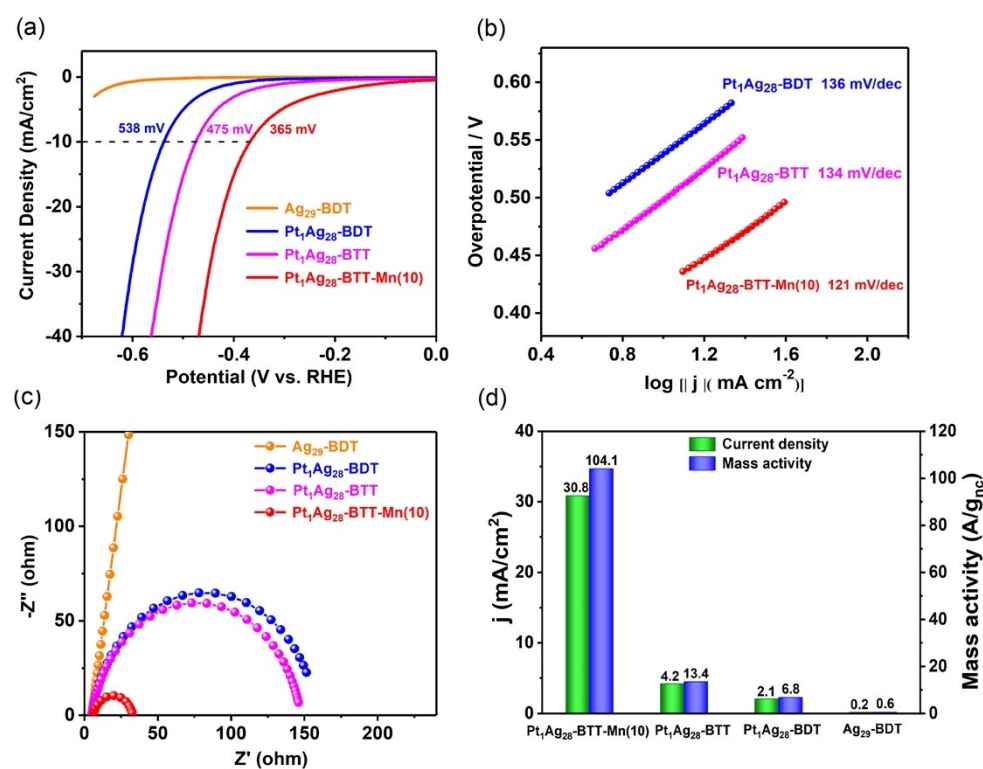

**Figure S8.** HER ability comparison a series of  $\text{M}_{29}$  nano-catalysts in 1 M KOH solution. Electrochemical measurement of (a) LSV curves; (b) Tafel slopes; and (c) EIS Nyquist plots; (d) Bar diagram of the current density and mass activity comparison for  $\text{M}_{29}$  nano-catalysts at the overpotential of 0.45 V versus RHE.

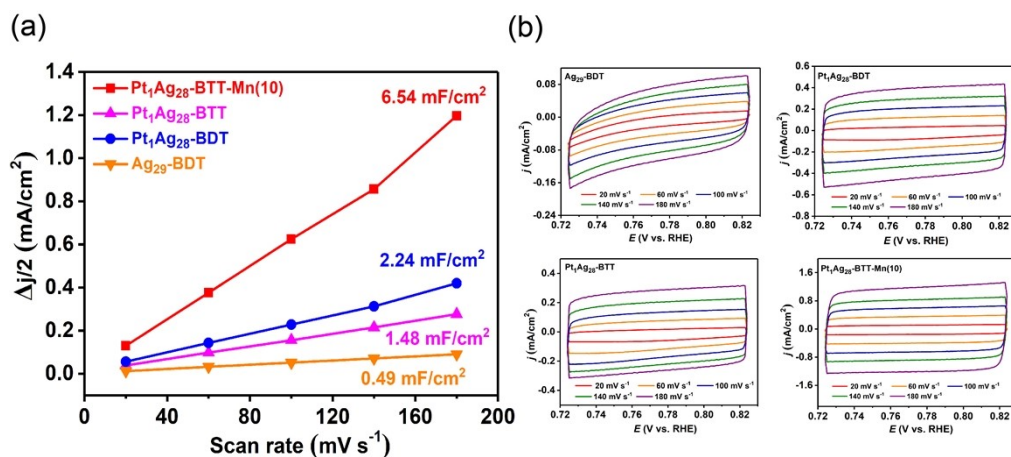

**Figure S9.** (a) The calculated  $C_{dl}$  for  $M_{29}$  nano-catalysts in 1 M KOH solution; (b) The corresponding CV curves of  $Ag_{29}\text{-BDT}$ ,  $Pt_1Ag_{28}\text{-BDT}$ ,  $Pt_1Ag_{28}\text{-BTT}$  and  $Pt_1Ag_{28}\text{-BTT-Mn(10)}$  at different scan rates of 20, 60, 100, 140, and 180 mV s<sup>-1</sup> in 1 M KOH solution.

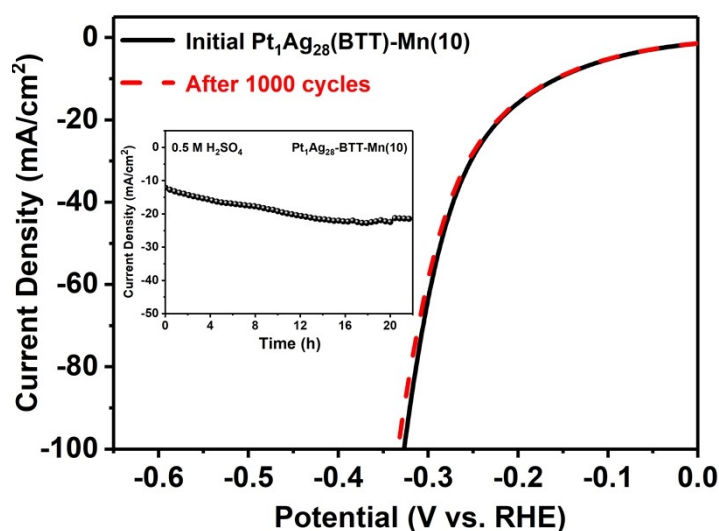

**Figure S10.** LSV curves of  $Pt_1Ag_{28}\text{-BTT-Mn(10)}$  before and after 1000 CV cycles sweeping (the inset shows the durability tests of  $Pt_1Ag_{28}\text{-BTT-Mn(10)}$  at a constant current density of 12 mA/cm<sup>2</sup> for 22 h) in 0.5 M H<sub>2</sub>SO<sub>4</sub>.

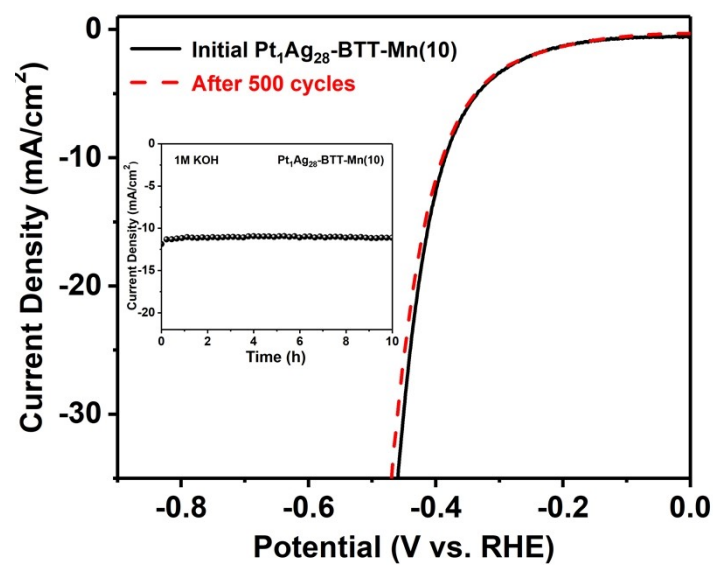

**Figure S11.** LSV curves of Pt<sub>1</sub>Ag<sub>28</sub>-BTT-Mn(10) before and after 500 CV cycles sweeping (the inset shows the durability tests of Pt<sub>1</sub>Ag<sub>28</sub>-BTT-Mn(10) at a constant current density of 12 mA/cm<sup>2</sup> for 10 h) in 1 M KOH.

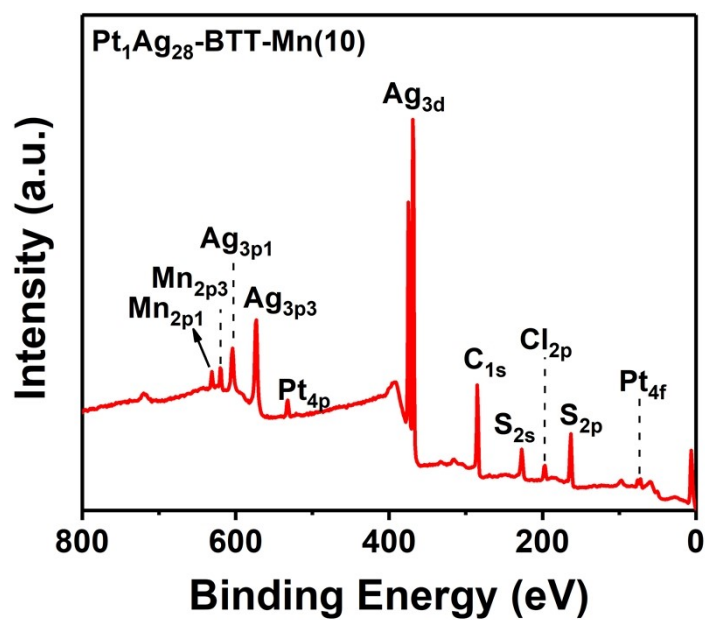

**Figure S12.** Total XPS spectra of Pt<sub>1</sub>Ag<sub>28</sub>-BTT-Mn(10).

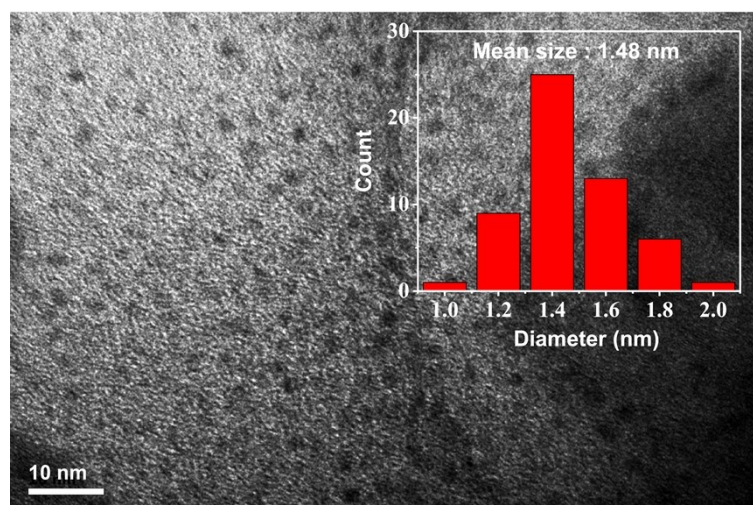

**Figure S13.** TEM image of Pt<sub>1</sub>Ag<sub>28</sub>-BTT-Mn(10) catalyst (loaded on XC-72R); inset: size distribution of Pt<sub>1</sub>Ag<sub>28</sub>-BTT-Mn(10).

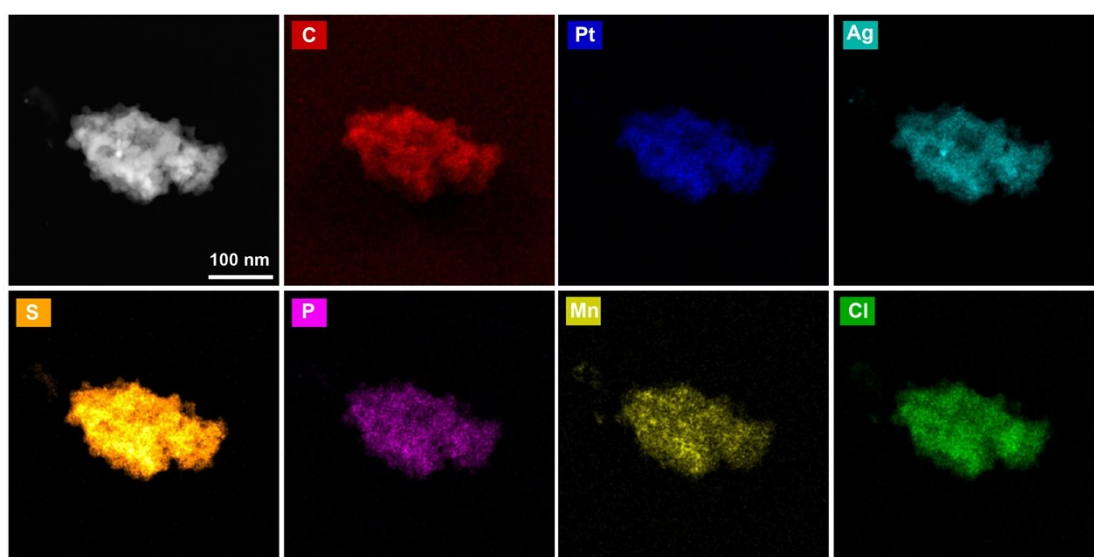

**Figure S14.** HAADF-STEM imaging and EDS-mapping of Pt<sub>1</sub>Ag<sub>28</sub>-BTT-Mn(10) catalyst.

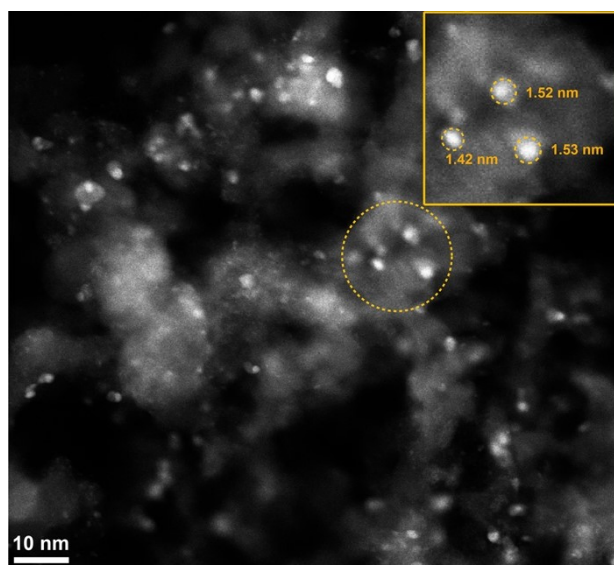

**Figure S15.** Aberration-corrected HAADF-STEM image of  $\text{Pt}_1\text{Ag}_{28}\text{-BTT-Mn(10)}$  ; inset: the magnified image of  $\text{Pt}_1\text{Ag}_{28}\text{-BTT-Mn(10)}$ .

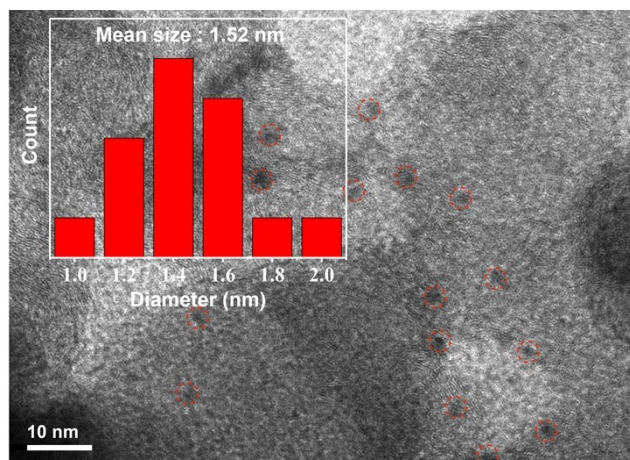

**Figure S16.** TEM image of  $\text{Pt}_1\text{Ag}_{28}\text{-BTT-Mn(10)}$  catalyst after HER; inset: size distribution of  $\text{Pt}_1\text{Ag}_{28}\text{-BTT-Mn(10)}$ .

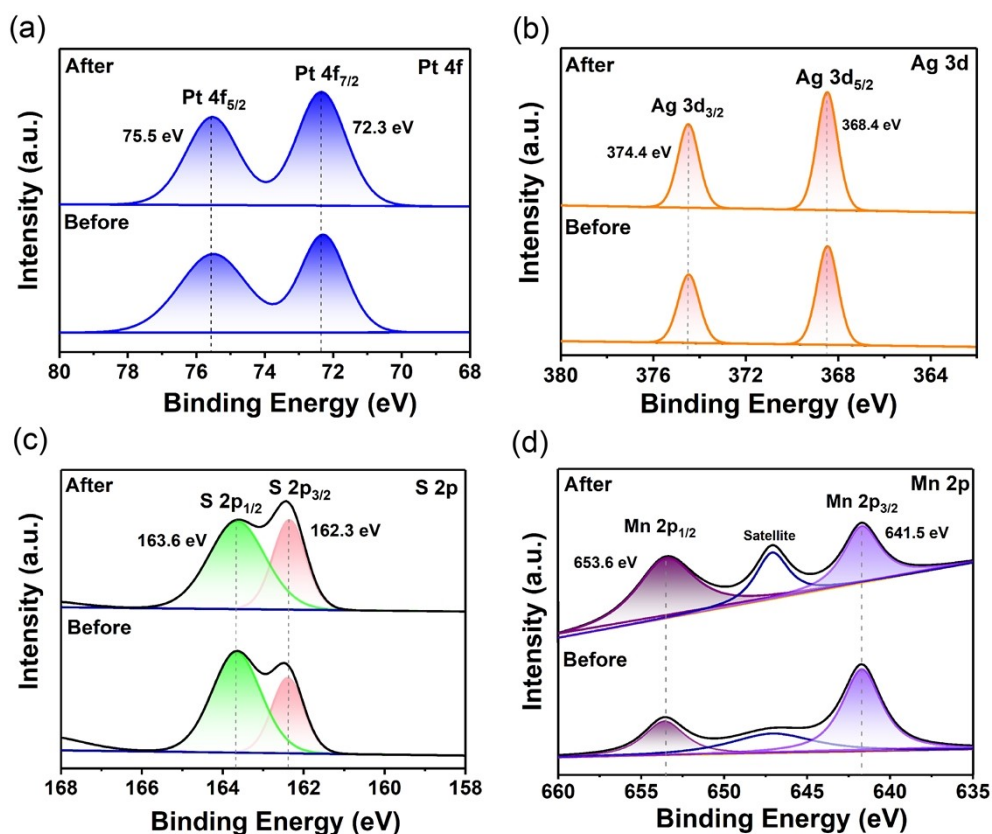

**Figure S17.** XPS spectra of Pt<sub>1</sub>Ag<sub>28</sub>-BTT-Mn(10) catalyst before and after HER testing. (a) Pt 4f, (b) Ag 3d, (c) S 2p, and (d) Mn 2p.

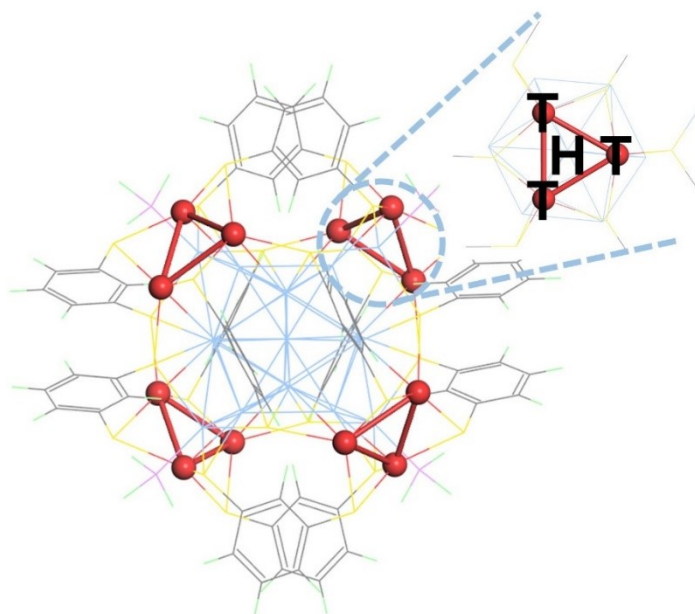

**Figure S18.** The geometry model and the illustration of adsorption sites of Ag<sub>29</sub>-BDT.

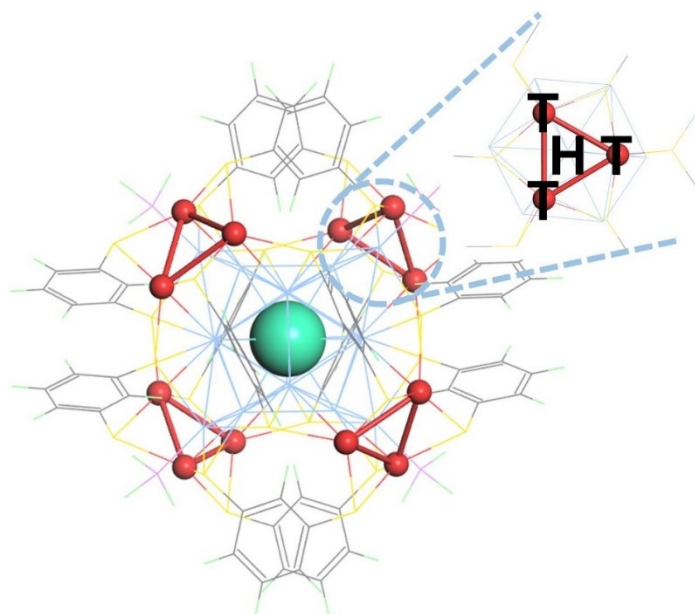

**Figure S19.** The geometry model and the illustration of adsorption sites of  $\text{Pt}_1\text{Ag}_{28}\text{-BDT}$ .

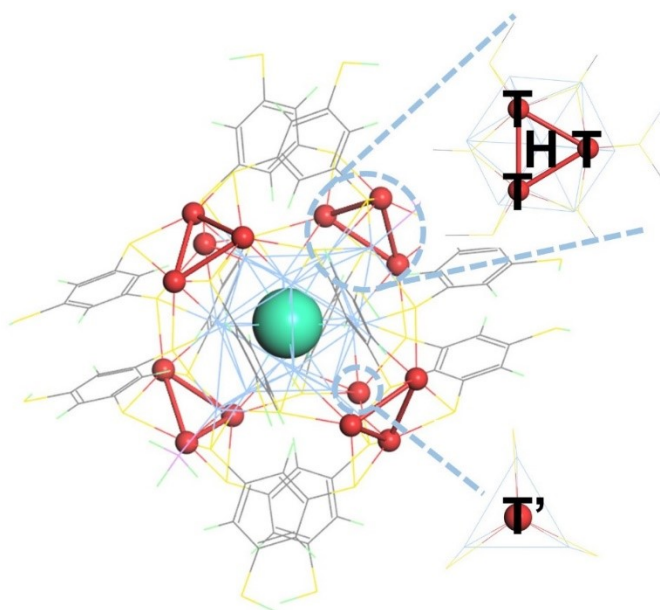

**Figure S20.** The geometry model and the illustration of adsorption sites of  $\text{Pt}_1\text{Ag}_{28}\text{-BTT}$ .

**Table S1.** Comparisons of HER performance for Au/Ag/Pt-based catalysts tested in 0.5 M H<sub>2</sub>SO<sub>4</sub> and 1.0 M KOH.

| Catalysts                                                                             | Electrolyte                          | $\eta$ (10 mA/cm <sup>2</sup> ) | Tafel slope (mV/dec) | Exchange current density (A/cm <sup>2</sup> ) | Ref       |
|---------------------------------------------------------------------------------------|--------------------------------------|---------------------------------|----------------------|-----------------------------------------------|-----------|
| Pt <sub>1</sub> Ag <sub>28</sub> -BTT-Mn(10)/C                                        | 0.5 M H <sub>2</sub> SO <sub>4</sub> | 146                             | 85                   | 9.50×10 <sup>-4</sup>                         | This work |
| Au <sub>36</sub> Ag <sub>2</sub> (SC <sub>10</sub> H <sub>15</sub> ) <sub>18</sub> /C | 0.5 M H <sub>2</sub> SO <sub>4</sub> | 250                             | 125                  | 2.24×10 <sup>-4</sup>                         | 11        |
| Au <sub>11</sub> @MoS <sub>2</sub>                                                    | 0.5 M H <sub>2</sub> SO <sub>4</sub> | 292                             | 63                   | NA                                            | 12        |
| Au <sub>2</sub> Pd <sub>6</sub> /MoS <sub>2</sub>                                     | 0.5 M H <sub>2</sub> SO <sub>4</sub> | 232                             | 67                   | 9.88×10 <sup>-6</sup>                         | 13        |
| Au <sub>25</sub> (PET) <sub>18</sub> /MoS <sub>2</sub>                                | 0.5 M H <sub>2</sub> SO <sub>4</sub> | 287                             | 79.3                 | NA                                            | 14        |
| Ag NCs/MoS <sub>2</sub>                                                               | 0.5 M H <sub>2</sub> SO <sub>4</sub> | 230                             | 106                  | NA                                            | 15        |
| PtO <sub>x</sub> /TiO <sub>2</sub>                                                    | 0.5 M H <sub>2</sub> SO <sub>4</sub> | 150                             | 40                   | 6.30×10 <sup>-5</sup>                         | 16        |
| Pt-Ag/SiNW                                                                            | 0.5 M H <sub>2</sub> SO <sub>4</sub> | 190                             | 54                   | 6.80×10 <sup>-6</sup>                         | 17        |
| Rh-Ag/SiNW                                                                            | 0.5 M H <sub>2</sub> SO <sub>4</sub> | 120                             | 51                   | 7.58×10 <sup>-5</sup>                         | 17        |
| AgPt/C <sub>3</sub> N <sub>4</sub>                                                    | 0.5 M H <sub>2</sub> SO <sub>4</sub> | 308                             | 120                  | NA                                            | 18        |
| NiAg <sub>24</sub> NCs                                                                | 1 M KOH                              | 270                             | 58                   | NA                                            | 19        |
| Au@Pd IHNP                                                                            | 1 M KOH                              | 659                             | 169                  | NA                                            | 20        |

**Table S2.** EXAFS fitting parameters at the Cu K-edge for various samples

| Sample                         | Shell | $N^a$ | $R(\text{\AA})^b$ | $\sigma^2(\text{\AA}^2)^c$ | $\Delta E_0(\text{eV})^d$ | $R$ factor |
|--------------------------------|-------|-------|-------------------|----------------------------|---------------------------|------------|
| Mn foil                        | Mn-Mn | 2.3   | 2.66              | 0.0070                     | 6.77                      | 0.0252     |
| Mn <sub>2</sub> O <sub>3</sub> | Mn-O  | 2.7   | 1.92              | 0.0005                     | -9.80                     | 0.0223     |
| MnO                            | Mn-O  | 6.0   | 1.91              | 0.0047                     | 0.68                      | 0.0110     |
| Sample                         | Mn-S  | 4.0   | 2.087             | 0.0026                     | 1.17                      | 0.0242     |

<sup>a</sup> $N$ : coordination numbers; <sup>b</sup> $R$ : bond distance; <sup>c</sup> $\sigma^2$ : Debye-Waller factors; <sup>d</sup>  $\Delta E_0$ : the inner potential correction.  $R$  factor: goodness of fit.  $S_0^2$  was set to 0.55, according to the experimental EXAFS fit of metal foil by fixing Mn as the known crystallographic value.

**Table S3.** Theoretical and experimental of molar ratio of  $n_{\text{cluster}} : n_{\text{Mn}}$  (measured by ICP-AES).

| Mole ratio of $n_{\text{cluster}} : n_{\text{Mn}}$ |              |
|----------------------------------------------------|--------------|
| Theoretical                                        | Experimental |
| 1 : 1                                              | 1 : 0.82     |
| 1 : 5                                              | 1 : 3.35     |
| 1 : 10                                             | 1 : 5.98     |
| 1 : 50                                             | 1 : 11.25    |

**Table S4.** The calculated  $\Delta G_{H^*}$  values for all tested models and sites.

| Models and sites                            | $\Delta G_{H^*}$ (eV) |
|---------------------------------------------|-----------------------|
| Ag <sub>29</sub> -BDT-H                     | 0.635                 |
| Ag <sub>29</sub> -BDT-T                     | 1.11                  |
| Pt <sub>1</sub> Ag <sub>28</sub> -BDT-H     | 0.606                 |
| Pt <sub>1</sub> Ag <sub>28</sub> -BDT-T     | 1.081                 |
| Pt <sub>1</sub> Ag <sub>28</sub> -BTT-H     | 0.617                 |
| Pt <sub>1</sub> Ag <sub>28</sub> -BTT-T     | 0.986                 |
| Pt <sub>1</sub> Ag <sub>28</sub> -BTT-T'    | 1.287                 |
| Pt <sub>1</sub> Ag <sub>28</sub> -BTT-Mn-H  | 0.616                 |
| Pt <sub>1</sub> Ag <sub>28</sub> -BTT-Mn-T  | 1.096                 |
| Pt <sub>1</sub> Ag <sub>28</sub> -BTT-Mn-T' | 1.405                 |
| Pt <sub>1</sub> Ag <sub>28</sub> -BTT-Mn-Mn | 0.186                 |

**Table S5.** Crystal data and structure refinement for [Pt<sub>1</sub>Ag<sub>28</sub>(BTT)<sub>12</sub>(TPP)<sub>2</sub>](PPh<sub>4</sub>)<sub>4</sub>.

|                                             |                                                                                                                                         |
|---------------------------------------------|-----------------------------------------------------------------------------------------------------------------------------------------|
| Empirical formula                           | Pt <sub>1</sub> Ag <sub>28</sub> S <sub>36</sub> P <sub>2</sub> C <sub>108</sub> H <sub>78</sub> + 4(C <sub>24</sub> H <sub>20</sub> P) |
| Formula weight                              | 7164.72                                                                                                                                 |
| Temperature/K                               | 120 K                                                                                                                                   |
| Crystal system                              | monoclinic                                                                                                                              |
| Space group                                 | C2/c                                                                                                                                    |
| a/Å                                         | 31.3153(2)                                                                                                                              |
| b/Å                                         | 21.4400(2)                                                                                                                              |
| c/Å                                         | 37.3504(3)                                                                                                                              |
| α/°                                         | 90                                                                                                                                      |
| β/°                                         | 97.916(10)                                                                                                                              |
| γ/°                                         | 90                                                                                                                                      |
| Volume/Å <sup>3</sup>                       | 24838.1(3)                                                                                                                              |
| Z                                           | 4                                                                                                                                       |
| ρ <sub>calc</sub> /cm <sup>3</sup>          | 1.916                                                                                                                                   |
| μ/mm <sup>-1</sup>                          | 21.799                                                                                                                                  |
| F(000)                                      | 13768.0                                                                                                                                 |
| Crystal size/mm <sup>3</sup>                | 1 × 1 × 0.2                                                                                                                             |
| Radiation                                   | CuK (λ = 1.54186)                                                                                                                       |
| Index ranges                                | -35 ≤ h ≤ 13, -24 ≤ k ≤ 24, -42 ≤ l ≤ 42                                                                                                |
| 2θ range for data collection/°              | 9.498 to 124.998                                                                                                                        |
| Reflections collected                       | 80478                                                                                                                                   |
| Independent reflections                     | 90277 [R <sub>int</sub> = 0.0473, R <sub>sigma</sub> = 0.0331]                                                                          |
| Data/restraints/parameters                  | 90277/2028/1125                                                                                                                         |
| Goodness-of-fit on F <sup>2</sup>           | 1.022                                                                                                                                   |
| Final R indexes [I >= 2σ (I)]               | R1 = 0.0838, wR2 = 0.2300                                                                                                               |
| Final R indexes [all data]                  | R1 = 0.0909, wR2 = 0.2420                                                                                                               |
| Largest diff. peak/hole / e Å <sup>-3</sup> | 4.21/-3.58                                                                                                                              |

## Reference

1. L. G. AbdulHalim, M. S. Bootharaju, Q. Tang, S. Del Gobbo, R. G. AbdulHalim, M. Eddaoudi, D.-e. Jiang and O. M. Bakr, *J. Am. Chem. Soc.*, 2015, **137**, 11970-11975.
2. M. S. Bootharaju, S. M. Kozlov, Z. Cao, M. Harb, M. R. Parida, M. N. Hedhili, O. F. Mohammed, O. M. Bakr, L. Cavallo and J.-M. Basset, *Nanoscale*, 2017, **9**, 9529-9536.
3. X. Kang, M. Zhou, S. Wang, S. Jin, G. Sun, M. Zhu and R. Jin, *Chem. Sci.*, 2017, **8**, 2581-2587.
4. S. Anantharaj and S. Noda, *J. Mater. Chem. A*, 2022, **10**, 9348-9354.
5. G. Kresse and D. Joubert, *Phys. Rev. B*, 1999, **59**, 1758-1775.
6. G. Kresse and J. Furthmüller, *Phys. Rev. B*, 1996, **54**, 11169-11186.
7. J. P. Perdew, K. Burke and Y. Wang, *Phys. Rev. B*, 1996, **54**, 16533-16539.
8. J. P. Perdew, K. Burke and M. Ernzerhof, *Phys. Rev. Letter*, 1996, **77**, 3865-3868.
9. S. Grimme, J. Antony, S. Ehrlich and H. Krieg, *J. Chem. Phys.*, 2010, **132**, 154104.
10. S. Grimme, S. Ehrlich and L. Goerigk, *J. Comput. Chem.*, 2011, **32**, 1456-65.
11. Y. Li, S. Li, A. V. Nagarajan, Z. Liu, S. Nevins, Y. Song, G. Mpourmpakis and R. Jin, *J. Am. Chem. Soc.*, 2021, **143**, 11102-11108.
12. S. Gratiou, A. Karmakar, D. Kumar, S. Kundu, S. Chakraborty and S. Mandal, *Nanoscale*, 2022, **14**, 7919-7926.
13. Y. Du, J. Xiang, K. Ni, Y. Yun, G. Sun, X. Yuan, H. Sheng, Y. Zhu and M. Zhu, *Inorg. Chem. Frontiers*, 2018, **5**, 2948-2954.
14. S. Zhao, R. Jin, Y. Song, H. Zhang, S. D. House, J. C. Yang and R. Jin, *Small*, 2017, **13**, 1701519.
15. M. Ghosal Chowdhury, L. Sahoo, S. Maity, D. Bain, U. K. Gautam and A. Patra, *ACS Appl. Nano Mater.*, 2022, **5**, 7132-7141.
16. X. Cheng, Y. Li, L. Zheng, Y. Yan, Y. Zhang, G. Chen, S. Sun and J. Zhang, *Energy Environ. Sci.*, 2017, **10**, 2450-2458.
17. B. Jiang, Y. Sun, F. Liao, W. Shen, H. Lin, H. Wang and M. Shao, *J. Mater. Chem. A*, 2017, **5**, 1623-1628.
18. R. Nazir, P. Fageria, M. Basu and S. Pande, *The J. Phy. Chem. C*, 2017, **121**, 19548-19558.
19. Y. Jo, M. Choi, M. Kim, J. S. Yoo, W. Choi and D. Lee, *Bull. Korean Chem. Soc.*, 2021, **42**, 1672-1677.
20. Y. Chen, X. Zeng, Y. Liu, R. Ye, Q. Liang and J. Hu, *Chem. Commun.*, 2021, **57**, 9410-9413.
